# Supplementary material
Source: publisher figshare collection journal article supplement (https://acs.figshare.com/ndownloader/files/3851578)
Supplement: Supplementary file 1 [file 3851578]

# Supporting Information

## Electrical Characteristics of Metal Catalyst- Assisted Etched Rough Silicon Nanowire Depending on the Diameter Size

*Sang Hoon Lee<sup>‡, a</sup>, Tae Il Lee<sup>‡, b</sup>, Su Jeong Lee,<sup>a</sup> Sang Myung Lee,<sup>c</sup> Ilgu Yun,<sup>c</sup> and Jae Min  
Myoung<sup>\*a</sup>*

<sup>a</sup>Department of Materials Science and Engineering, Yonsei University, Seoul, Korea

<sup>b</sup>Department of BioNano Technology, Gachon University, Seongnam, Korea.

<sup>c</sup>Department of Electrical and Electronic Engineering, Yonsei University, Seoul, Korea

**Corresponding Author**

\*E-mail: [jmmyoung@yonsei.ac.kr](mailto:jmmyoung@yonsei.ac.kr)

## Supporting Figures

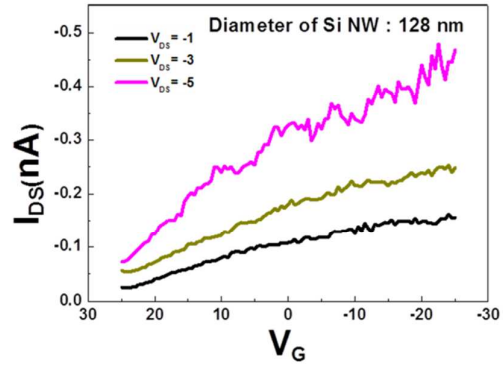

**Figure S1.** The electrical property (transfer curve) of Si NW FET without hydrazine treatment.

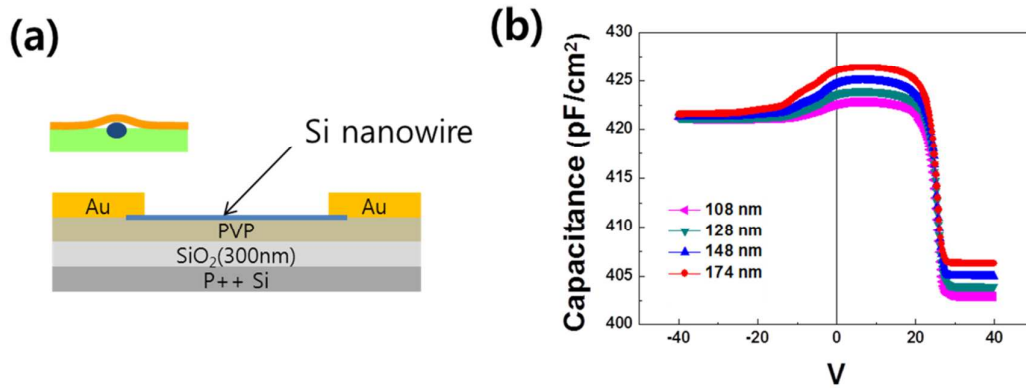

**Figure S2.** (a) The structure of device for simulating capacitance of a Si NW-embedded gate insulator and (b) its result along to various diameters of embedded Si NW.

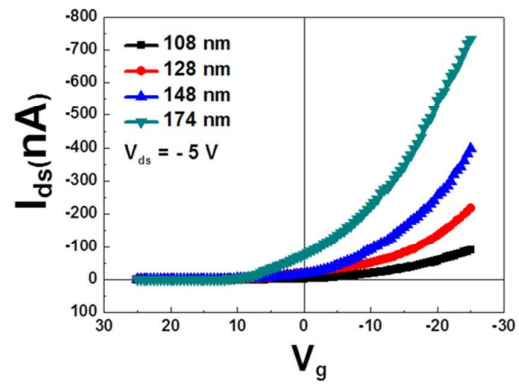

**Figure S3.** The transfer characteristic of Si NW FET with varying the diameter of Si NW embedded in PVP layer.
